# Supplementary material
Source: MDPI journal article supplement (https://www.mdpi.com/2073-4352/12/12/1753)
Supplement: s1 [file s1]

## Supplementary Material

### Aero–TiO<sub>2</sub> Prepared on the Basis of Networks of ZnO Tetrapods

Vladimir Ciobanu <sup>1,\*</sup>, Veaceslav V. Ursaki <sup>1,2</sup>, Sebastian Lehmann <sup>3</sup>, Tudor Braniste <sup>1</sup>, Simion Raevschi <sup>4</sup>, Victor V. Zalamai <sup>1</sup>, Eduard V. Monaico <sup>1</sup>, Pascal Colpo <sup>5</sup>, Kornelius Nielsch <sup>3</sup> and Ion M. Tiginyanu <sup>1,2</sup>

<sup>1</sup> National Center for Materials Study and Testing, Technical University of Moldova, 2004 Chisinau, Republic of Moldova; vladimir.ciobanu@cnstm.utm.md (V.C.); vvursaki@gmail.com (V.V.U.); tudor.braniste@cnstm.utm.md (T.B.); victor.zalamai@cnstm.utm.md (V.V.Z.); eduard.monaico@cnstm.utm.md (E.V.M.); tiginyanu@asm.md (I.M.T.);

<sup>2</sup> Academy of Sciences of Moldova, 2001 Chisinau, Republic of Moldova;

<sup>3</sup> Institute for Metallic Materials (IMW), Leibniz Institute of Solid State and Materials Research (IFW Dresden), Helmholtzstrasse 20, 01069 Dresden, Germany; s.lehmann@ifw-dresden.de (S.L.); k.nielsch@ifw-dresden.de (K.N.);

<sup>4</sup> Department of Physics and Engineering, State University of Moldova, Alexei Mateevici Str. 60, 2009 Chisinau, Moldova; raevskis@mail.ru (S.R.);

<sup>5</sup> European Commission Joint Research Centre, Ispra, Italy; pascal.colpo@ec.europa.eu (P.C.).

\* Correspondence: vladimir.ciobanu@cnstm.utm.md

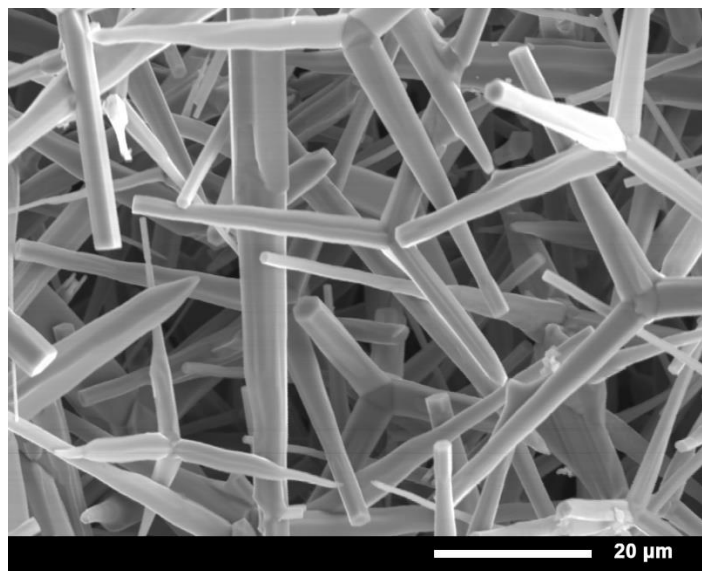

**Figure S1.** SEM image of ZnO microtetrapods covered by a thin TiO<sub>2</sub> layer.

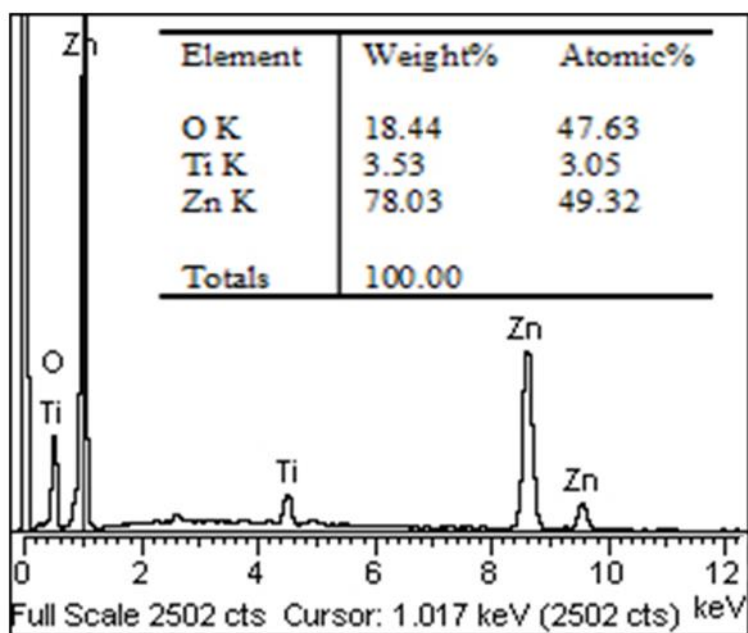

**Figure S2.** Results of EDX analysis of ZnO microtetrapods covered by a thin TiO<sub>2</sub> layer.

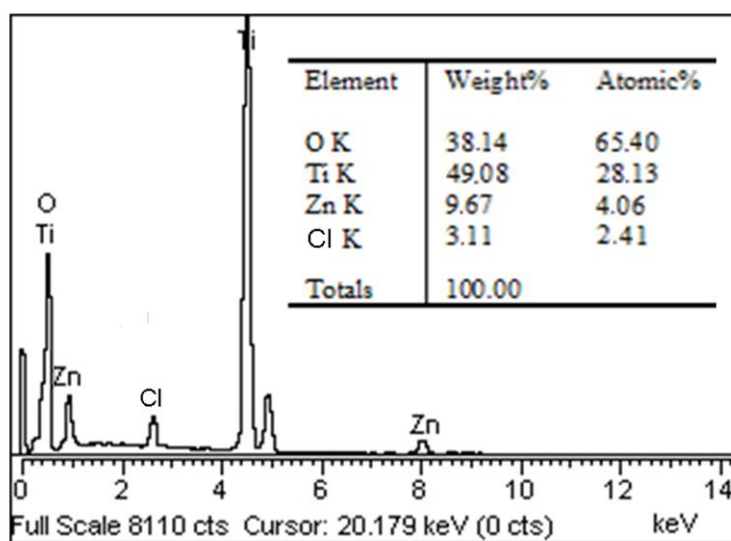

**Figure S3.** Results of EDX analysis of a sample prepared by etching in the HVPE system.

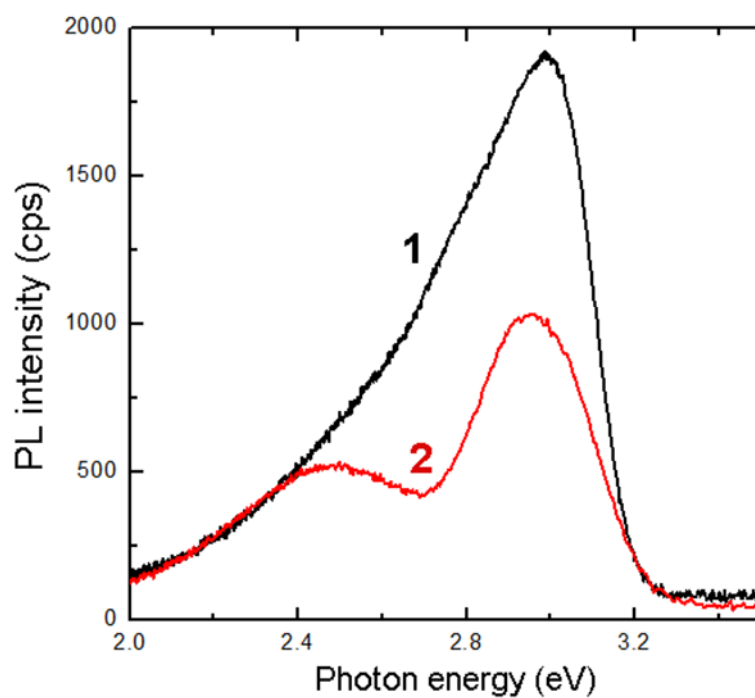

**Figure S4.** PL spectra of a sample prepared by etching in the HVPE system measured at 10 K (curve 1) and at room temperature (curve 2).

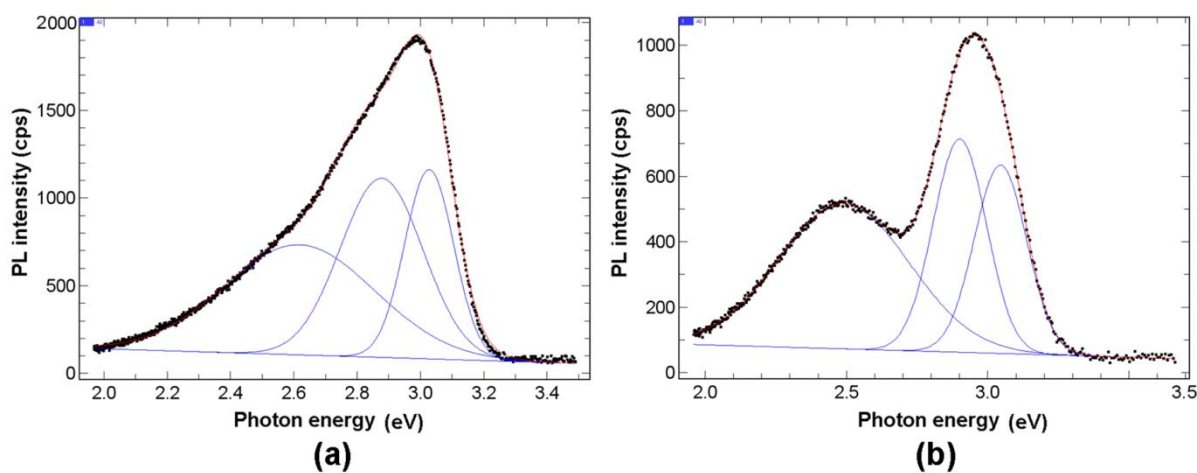

**Figure S5.** (a) Deconvolution of PL spectrum measured at 10 K and (b) at room temperature for a sample prepared by etching in the HVPE system.
